# Supplementary material for: Alpha-Linolenic Acid Modulates T Cell Incorporation in a 3D Tissue-Engineered Psoriatic Skin Model
Source: Cells. 2022 Apr 30;11(9):1513. doi: 10.3390/cells11091513 (PMC9104007; doi:10.3390/cells11091513)
Supplement: Supplementary file 1 [file cells-11-01513-s001.zip › cells-1703497-supplementary.pdf]

## Supplementary Material

### Supplementary Figures

Western blot analyses were conducted to investigate the levels of a key epidermal marker in psoriasis, namely keratin 17. Keratin 17 (K17) is an intermediate protein found in healthy basal keratinocytes and its expression spreads aberrantly into the supra-basal psoriatic keratinocytes [1]. K17 was highly expressed in PS and PS<sup>+T</sup> when compared with HS. This deregulation in the level of expression of K17 is representative of what is found in psoriatic skin in vivo [1]. Our results show that ALA supplementation restored the differentiation program of psoriatic keratinocytes, since the expression of K17 was significantly downregulated in PS<sup>+T+ALA</sup> compared with PS<sup>+T</sup> and PS, and was closer to the level of expression found in HS.

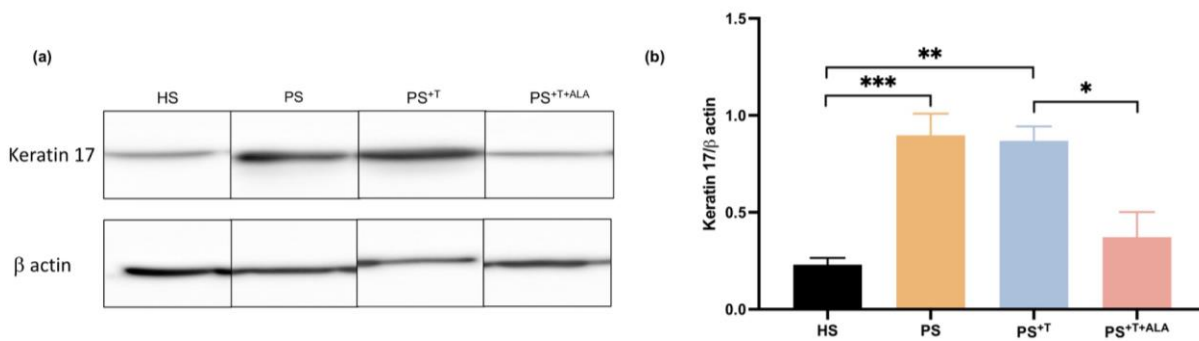

**Figure S1. K17 expression in HS, PS, PS<sup>+T</sup> PS<sup>+T+ALA</sup>** (a) Twenty micrograms of total protein from skin substitutes were analyzed by immunoblot for the presence of K17.  $\beta$ -actin was used to control equal loading. One representative immunoblot is shown per protein. (N = 3 healthy donors and 3 psoriatic donors per condition;  $n$  = 2 skin substitutes per condition); (b) Densitometric analyses of the immunoblot from panel (a). Statistical significance was determined using one-way ANOVA followed by Tukey's post-hoc test. (\*  $p$ -value < 0.05; \*\*  $p$ -value < 0.001; \*\*\*  $p$ -value < 0.0001).

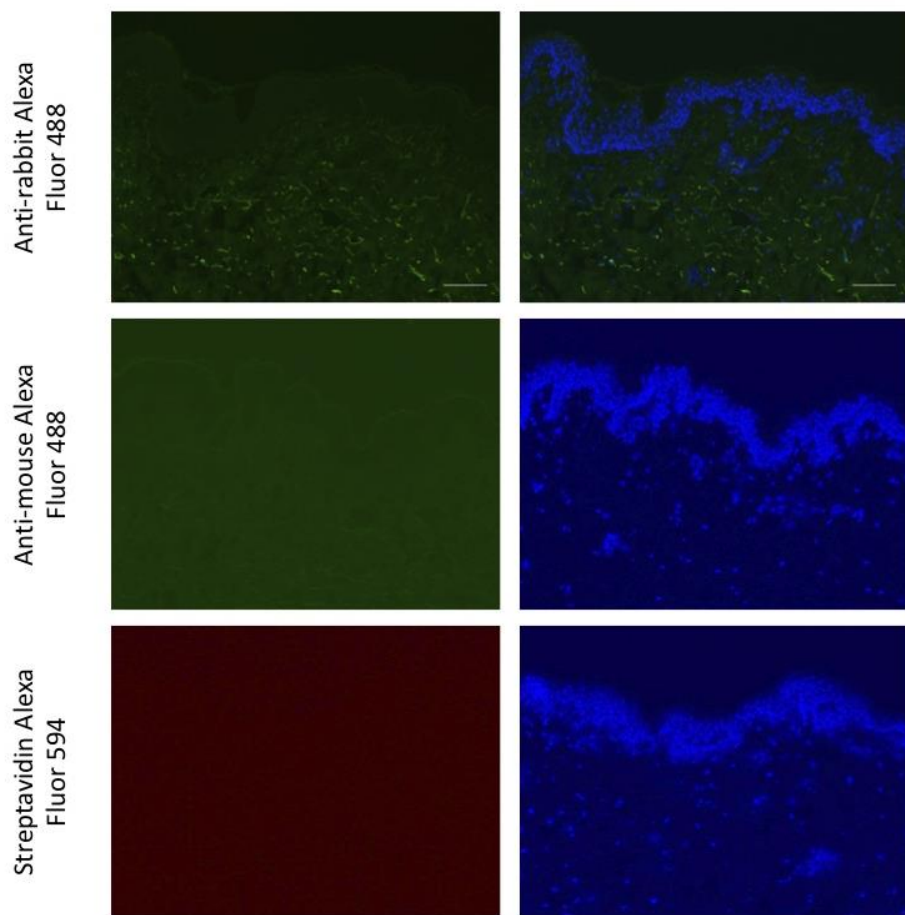

**Figure S2.** Negative controls of secondary antibodies used for immunofluorescence staining on normal human skin. Indirect immunofluorescence staining was carried out on normal human skin. Nuclei were counterstained with DAPI reagent (blue).

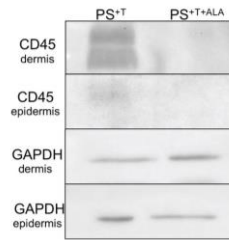

**Figure S3.** CD45 expression in PS<sup>+</sup>T and PS<sup>+</sup>T+ALA. Twenty micrograms of total protein from skin substitutes were analyzed by immunoblot for the presence of CD45. GAPDH was used to control equal loading. One representative immunoblot is shown.

### Supplementary Tables

**Table S1.** Complete list of antibodies used for indirect immunofluorescence and western-blot analyses

| Antigens                               | Source                          | Company                   | Catalog Number | Lot Number | Dilution             |
|----------------------------------------|---------------------------------|---------------------------|----------------|------------|----------------------|
| <i>Primary Antibodies</i>              |                                 |                           |                |            |                      |
| <b>Anti-human Ki67</b>                 | Mouse monoclonal IgG1           | BD Biosciences            | 556003         | 8072956    | 1/400                |
| <b>Anti-human loricrin</b>             | Rabbit polyclonal IgG           | Biolegend                 | 905104         | B243235    | 1/1000               |
| <b>Anti-human transglutaminase 1</b>   | Rabbit polyclonal IgG           | ProteinTech               | 12912-3-AP     | 00001863   | 1/300                |
| <b>Anti-human involucrin</b>           | Mouse monoclonal IgG1           | Sigma                     | I9018          | 103M4788   | 1/400                |
| <b>Anti-human filaggrin</b>            | Rabbit polyclonal IgG           | Biolegend                 | 905804         | B2443692   | 1/500                |
| <b>Anti-human CD3</b>                  | Mouse monoclonal IgG1, $\kappa$ | Biolegend                 | 344820         | B240446    | 1/100                |
| <b>Anti-human CD45</b>                 | Rabbit polyclonal IgG           | Abcam                     | ab10558        | GR155209-2 | 1/500                |
| <b>Anti-human ICAM-1/CD54 antibody</b> | Rabbit polyclonal IgG           | Cell signaling technology | 67836          | 1          | 1/500                |
| <b>p-p38</b>                           | Rabbit phosphorylated p-38 MAPK | Cell signaling technology | 9211           | 24         | 1/1000               |
| <b>p38</b>                             | Rabbit p38 MAPK                 | Cell signaling technology | 9212           | 26         | 1/1000               |
| <b>Anti-actin beta</b>                 | Mouse monoclonal actin beta     | Sigma                     | A5441          | 079M4799V  | 1/30 000 (epidermis) |

|                                     |                       |                                     |             |         |                          |
|-------------------------------------|-----------------------|-------------------------------------|-------------|---------|--------------------------|
|                                     |                       |                                     |             |         | and 1/10 000<br>(dermis) |
| <i>Secondary antibodies</i>         |                       |                                     |             |         |                          |
| <b>Anti-rabbit Alexa Fluor 488</b>  | Donkey polyclonal IgG | Life Technologies                   | A21206      | 1754421 | 1/1600                   |
| <b>Anti-mouse Alexa Fluor 488</b>   | Goat polyclonal IgG   | Life Technologies                   | A11001      | 1890503 | 1/1600                   |
| <b>Streptavidin Alexa Fluor 594</b> | Conjugate             | Life Technologies                   | S-11227     | 65B2-1  | 1/1000                   |
| <b>Anti-rabbit HRP</b>              | Goat polyclonal IgG   | Jackson ImmunoResearch Laboratories | 111-035-003 | -       | 1/60 000                 |

**Table S2.** Levels of fatty acids in phospholipids of skin substitutes after ALA supplementation

| Phospholipids                              |                   |                   |                   |                      |         |
|--------------------------------------------|-------------------|-------------------|-------------------|----------------------|---------|
| Mean $\pm$ SD ( $\mu$ g/g of Tissue)       |                   |                   |                   |                      |         |
| Fatty Acids                                | HS                | PS                | PS <sup>+T</sup>  | PS <sup>+T+ALA</sup> | P-Value |
| <b>Saturated FAs</b>                       |                   |                   |                   |                      |         |
| 14:0 (Myristic acid)                       | 36.2 $\pm$ 10.8   | 89.8 $\pm$ 22.4   | 77.4 $\pm$ 41.6   | 39.2 $\pm$ 24.4      | NS      |
| 16:0 (Palmitic acid)                       | 295.1 $\pm$ 117.9 | 639.1 $\pm$ 246.8 | 494.6 $\pm$ 301.4 | 305.4 $\pm$ 68.2     | NS      |
| 18:0 (Stearic acid)                        | 233.7 $\pm$ 89.4  | 453.4 $\pm$ 141.4 | 365.1 $\pm$ 168.9 | 310.4 $\pm$ 72.7     | NS      |
| 20:0                                       | 10.5 $\pm$ 6.9    | 15.4 $\pm$ 4.3    | 11.6 $\pm$ 4.2    | 11.5 $\pm$ 4.3       | NS      |
| 22:0                                       | 12.0 $\pm$ 2.8    | 29.3 $\pm$ 5.8    | 24.0 $\pm$ 7.3    | 22.5 $\pm$ 9.6       | NS      |
| 24:0                                       | 36.2 $\pm$ 10.3   | 44.8 $\pm$ 35.8   | 39.7 $\pm$ 18.6   | 46.0 $\pm$ 24.8      | NS      |
| <b>n-3 PUFAs</b>                           |                   |                   |                   |                      |         |
| t-18:3n-3                                  | ND                | ND                | ND                | ND                   | NS      |
| 18:3n-3 (ALA)                              | ND                | ND                | ND                | 23.3 $\pm$ 17.2      | <0.05   |
| 20:3n-3 (ETE)                              | ND                | ND                | ND                | 2.845 $\pm$ 5.7      | NS      |
| 20:4n-3 (ETA)                              | ND                | 0.42 $\pm$ 1.0    | 4.3 $\pm$ 8.5     | 13.2 $\pm$ 19.7      | NS      |
| 20:5n-3 (EPA)                              | 2.5 $\pm$ 2.8     | 5.2 $\pm$ 3.0     | 2.0 $\pm$ 2.7     | 51.6 $\pm$ 21.6      | <0.0001 |
| 22:3n-3                                    | ND                | ND                | ND                | ND                   | NS      |
| 22:5n-3 (DPA)                              | 9.1 $\pm$ 7.2     | 20.2 $\pm$ 6.8    | 28.4 $\pm$ 22.2   | 68.4 $\pm$ 30.0      | <0.0001 |
| 22:6n-3 (DHA)                              | 10.3 $\pm$ 7.7    | 20.7 $\pm$ 13.2   | 13.6 $\pm$ 7.1    | 24.4 $\pm$ 7.0       | NS      |
| <b>n-5 PUFAs</b>                           |                   |                   |                   |                      |         |
| t-14:1n-5                                  | 3.1 $\pm$ 2.4     | ND                | ND                | ND                   | NS      |
| 14:1n-5                                    | ND                | ND                | ND                | ND                   | NS      |
| 18:1n-5                                    | 5.2 $\pm$ 2.9     | 21.4 $\pm$ 4.3    | 24.3 $\pm$ 8.1    | 10.1 $\pm$ 9.3       | NS      |
| <b>n-6 PUFAs</b>                           |                   |                   |                   |                      |         |
| 18:1                                       | ND                | ND                | ND                | ND                   | NS      |
| t-18:2n-6                                  | 2.8 $\pm$ 3.5     | 2.2 $\pm$ 3.8     | 3.1 $\pm$ 3.2     | 2.7 $\pm$ 2.7        | NS      |
| 9c12t-18:2n-6                              | ND                | 7.9 $\pm$ 3.5     | 10.1 $\pm$ 5.3    | 7.5 $\pm$ 6.7        | NS      |
| 8t12c-18:2n-6                              | 4.6 $\pm$ 4.3     | 10.1 $\pm$ 10.6   | ND                | ND                   | NS      |
| 18:2n-6 (LA)                               | 116.3 $\pm$ 74.0  | 147.5 $\pm$ 57.7  | 114.7 $\pm$ 62.3  | 173.1 $\pm$ 95.9     | NS      |
| 18:3n-6 ( $\gamma$ -linolenic acid)        | ND                | 4.8 $\pm$ 6.6     | 6.3 $\pm$ 6.6     | 3.7 $\pm$ 7.5        | NS      |
| 20:2n-6                                    | ND                | ND                | ND                | ND                   | NS      |
| 20:3n-6 (dihomo- $\gamma$ -linolenic acid) | 15.2 $\pm$ 11.9   | 68.5 $\pm$ 19.1   | 65.0 $\pm$ 47.2   | 49.2 $\pm$ 36.4      | NS      |
| 20:4n-6 (AA)                               | 50.8 $\pm$ 41.6   | 160.8 $\pm$ 50.6  | 202.8 $\pm$ 121.6 | 98.7 $\pm$ 62.3      | <0.001  |
| 22:2n-6                                    | ND                | ND                | ND                | ND                   | NS      |

|                            |                |                |                |                |    |
|----------------------------|----------------|----------------|----------------|----------------|----|
| 22:4n-6                    | 6.8 ± 5.4      | 50.1 ± 24.6    | 41.1 ± 14.5    | 18.6 ± 5.6     | NS |
| 22:5n-6                    | ND             | 11.8 ± 6.3     | 8.8 ± 2.9      | 2.8 ± 5.7      | NS |
| <b>n-7 MUFAs</b>           |                |                |                |                |    |
| t-16:1n-7                  | 1.0 ± 2.5      | ND             | ND             | ND             | NS |
| 16:1n-7 (Palmitoleic acid) | 177.28 ± 57.9  | 359.3 ± 76.0   | 346.8 ± 176.5  | 170.4 ± 135.5  | NS |
| t-18:1n-7                  | ND             | ND             | ND             | ND             | NS |
| 18:1n-7 (Vaccenic acid)    | 280.3 ± 92.6   | 545.1 ± 109.6  | 487.1 ± 201.6  | 247.3 ± 180.6  | NS |
| <b>n-9 MUFA</b>            |                |                |                |                |    |
| t-18:1n-9                  | ND             | ND             | ND             | ND             | NS |
| 18:1n-9 (Oleic acid)       | 656.1 ± 265.1  | 1114.3 ± 307.0 | 882.1 ± 409.5  | 560.5 ± 182.1  | NS |
| 20:1n-9                    | 11.5 ± 4.6     | 19.2 ± 7.6     | 13.9 ± 7.6     | 5.3 ± 4.7      | NS |
| 22:1n-9                    | 3.6 ± 4.0      | 1.0 ± 1.7      | 0.7 ± 1.3      | ND             | NS |
| 24:1n-9                    | 18.7 ± 6.5     | 35.7 ± 12.1    | 28.0 ± 13.0    | 18.0 ± 5.1     | NS |
| <b>n-12 MUFA</b>           |                |                |                |                |    |
| t-18:1n-12                 | ND             | ND             | ND             | ND             | NS |
| 18:1n-12                   | 7.2 ± 7.6      | ND             | ND             | ND             | NS |
| 20:1n-12                   | ND             | ND             | ND             | ND             | NS |
| <b>Totals</b>              |                |                |                |                |    |
| Total SFAs                 | 623.6 ± 228.1  | 1294.2 ± 447.9 | 1035.2 ± 543.7 | 757.8 ± 142.0  | NS |
| Total PUFAs                | 246.1 ± 113.3  | 537.8 ± 178.1  | 362.7 ± 148.3  | 389.5 ± 88.4   | NS |
| Total MUFAs                | 1164.5 ± 428.6 | 2173.1 ± 517.8 | 1848.1 ± 853.6 | 1043.5 ± 533.9 | NS |
| Total FAs                  | 1913.7 ± 1021  | 2749.4 ± 657.9 | 2257.4 ± 1009  | 1463.7 ± 532.4 | NS |

**Table S3.** Levels of most altered cytokines measured by the array in each skin substitutes. Data are represented as means ±SD.

| Cytokine    | PS                | PS <sup>+</sup> T | PS <sup>+</sup> T+ALA | P-value |
|-------------|-------------------|-------------------|-----------------------|---------|
| CCL2/MCP-1  | 47626.12 ± 1741.2 | 64411 ± 738.21    | 46456 ± 1616.4        | <0.0001 |
| MIP-1alpha  | 734 ± 94.7        | 8367.5 ± 333.1    | 6677.5 ± 153.4        | 0.0002  |
| CCL5/RANTES | 694 ± 59.4        | 8427 ± 113.1      | 6316.5 ± 82.7         | 0.0001  |
| CXCL1       | 31575.5 ± 2109.3  | 39820.5 ± 822.4   | 26549 ± 537.4         | <0.0001 |
| CXCL10      | 524 ± 267.3       | 42640 ± 997.0     | 32095.5 ± 2263.4      | <0.0001 |
| CXCL12      | 2230 ± 104.5      | 9240.5 ± 210      | 9104.5 ± 219.9        | 0.0005  |
| ICAM-1      | 758.5 ± 19.1      | 13021 ± 130.1     | 8589.5 ± 188.8        | <0.0001 |
| IL-6        | 49421.8 ± 2038.8  | 53923 ± 230.5     | 40635.5 ± 58.7        | <0.0001 |
| IL-8        | 49314 ± 1204.1    | 43160 ± 5782.7    | 36332 ± 3477.6        | <0.0001 |

|  |  |  |  |  |
|--|--|--|--|--|
|  |  |  |  |  |
|--|--|--|--|--|

## Reference

1. Lin, Y.; Zhang, W.; Li, B.; Wang, G. Keratin 17 in psoriasis: Current understanding and future perspectives. *Semin Cell Dev. Biol.* **2021**, 10.1016/j.semcdb.2021.06.018, doi:10.1016/j.semcdb.2021.06.018.
